# Supplementary material
Source: PubMed Central journal article supplement (PMC7803150)
Supplement: mmc1.pdf [file mmc1.pdf]

**Cell, Volume 184**

**Supplemental Information**

**Adaptive immunity to SARS-CoV-2 and COVID-19**

**Alessandro Sette and Shane Crotty**

## A. Viral loads

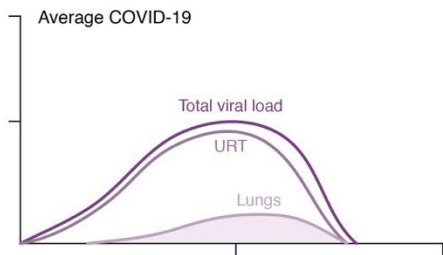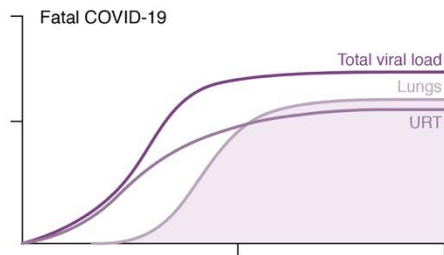

## B. Innate immunity

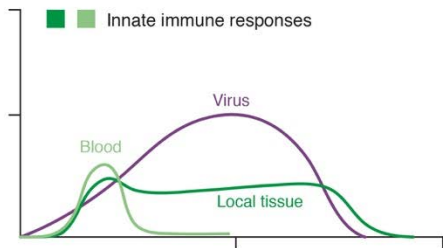

## C. T cell responses

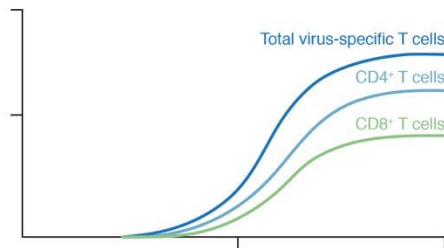

## D. Antibodies

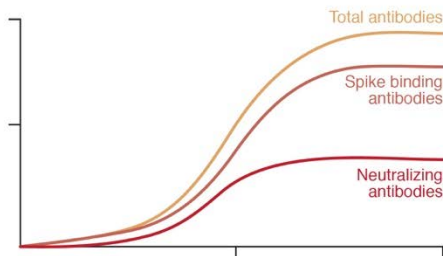

Figure S1. Model elaborations

- (A) Conceptual schematics of viral loads, elaborated to represent both URT and lungs.
- (B) Innate immune responses, elaborated to represent both blood (serum/plasma) cytokines/chemokines and local tissue innate immune responses, in an average case of COVID-19.
- (C) T cell responses, elaborated to individually show virus-specific CD4<sup>+</sup> T cells and CD8<sup>+</sup> T cells, in an average case of COVID-19.
- (D) Antibody responses, elaborated to show binding antibodies and neutralizing antibodies, in an average case of COVID-19.
